# Supplementary material for: Dexamethasone-induced immunosuppression: mechanisms and implications for immunotherapy
Source: PubMed Central journal article supplement (PMC5996496; doi:10.1186/s40425-018-0371-5), 2018-06-11

**Supplementary Figure S1.**  
**T cell stimulated with  $\alpha$ CD3/ $\alpha$ CD28 microbeads proliferate in the presence of dexamethasone**

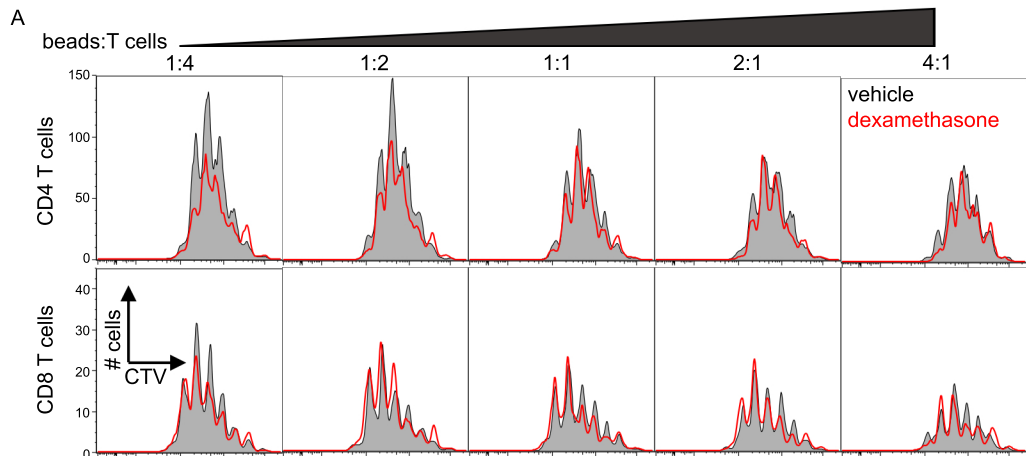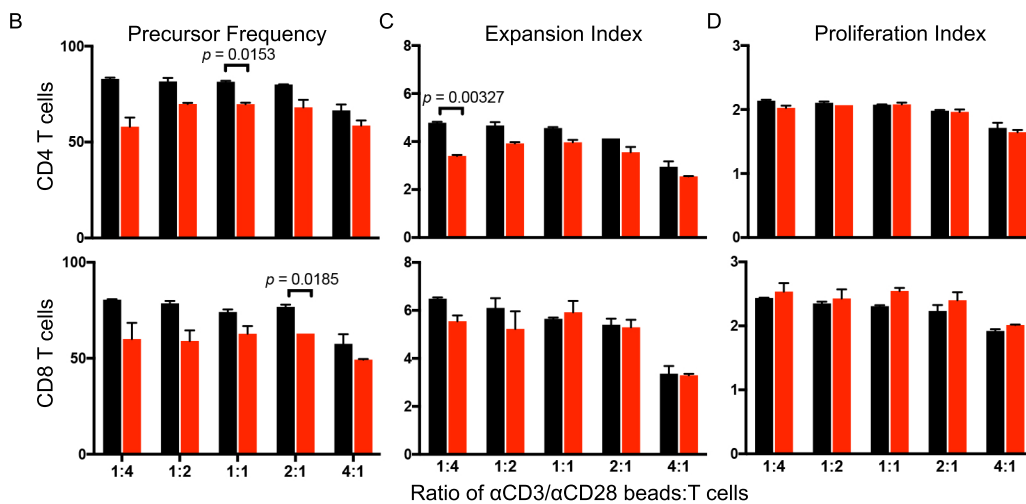

Supplement: 40425_2018_371_MOESM1_ESM.pdf [file 40425_2018_371_MOESM1_ESM.pdf]
