# Supplementary material for: Dexamethasone-induced immunosuppression: mechanisms and implications for immunotherapy
Source: PubMed Central journal article supplement (PMC5996496; doi:10.1186/s40425-018-0371-5), 2018-06-11

**Supplementary Figure S2.**  
**Dexamethasone does not induce apoptosis of stimulated T cells**

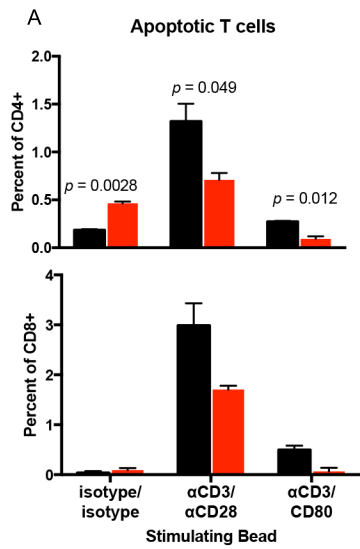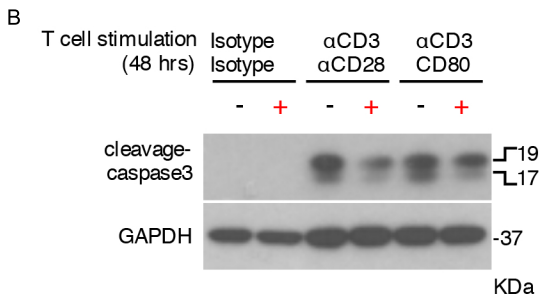

Supplement: 40425_2018_371_MOESM2_ESM.pdf [file 40425_2018_371_MOESM2_ESM.pdf]
