# Supplementary material for: Dexamethasone-induced immunosuppression: mechanisms and implications for immunotherapy
Source: PubMed Central journal article supplement (PMC5996496; doi:10.1186/s40425-018-0371-5), 2018-06-11

Supplementary Figure S3  
T cell differentiation subsets formed during *in vitro* stimulation

A

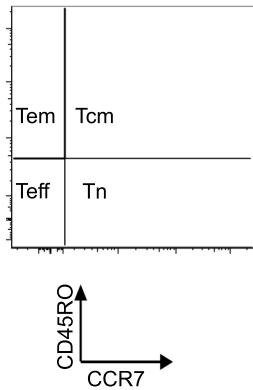

B

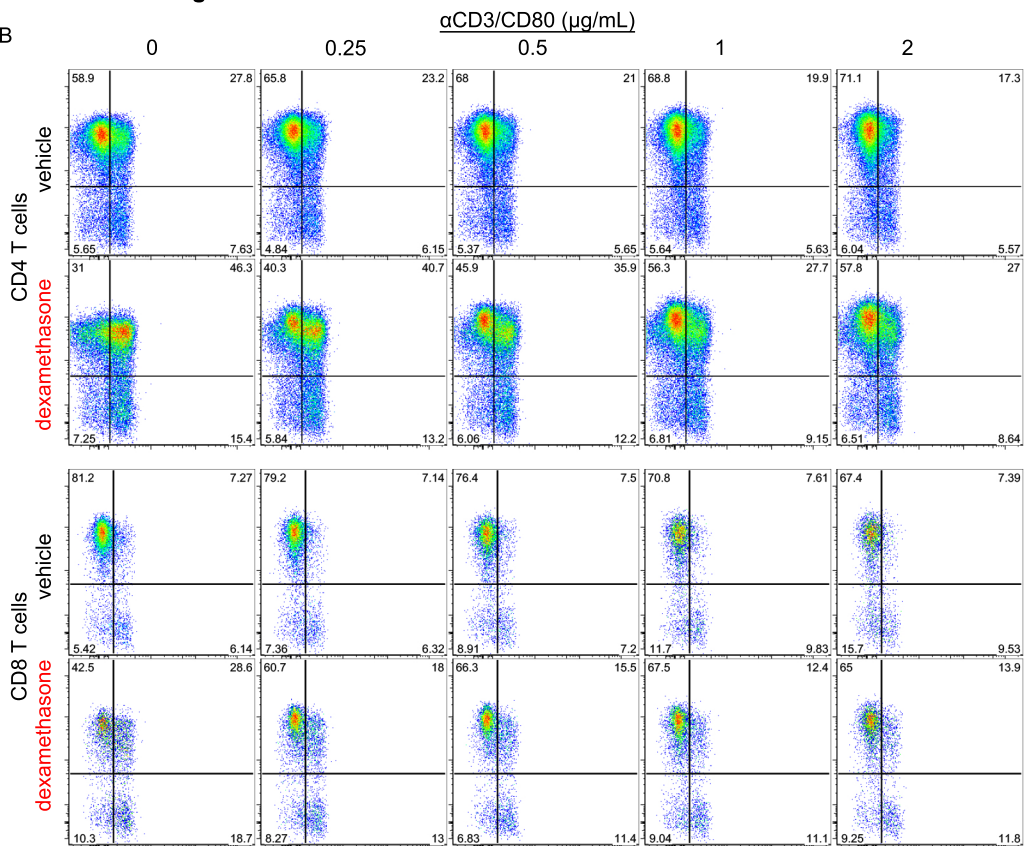

Supplement: 40425_2018_371_MOESM3_ESM.pdf [file 40425_2018_371_MOESM3_ESM.pdf]
